# Supplementary material for: The β C–C bond scission in alkoxy radicals: thermal unimolecular decomposition of t-butoxy radicals
Source: Royal Society of Chemistry journal article supplement (doi:10.1039/b000009o), 2000-01-01
Supplement: table-s1.doc [file table-s1.doc]

**Table SI:**
First-order rate constant k1 for the unimolecular decomposition of t-C4H9O in the presence of helium. The t-C4H9O-radicals were generated in 351 and 248 nm laser flash photolysis of t-C4H9ONO. Rate constants have been evaluated by eqs. (4) and (5). (No. = number of experiments).

| **T / K** | **[He] / cm-3** | **[t-C4H9ONO]0 / 1014 cm-3** | **k1 / s-1** | **No.** |
| --- | --- | --- | --- | --- |
| 323 | 8.94e+017 | 1 – 6 | 3500 | 6 |
|  | 9.23e+017 | 0.2 – 0.6 | 3300 | 5 |
|  | 1.79e+018 | 1 – 6 | 4700 | 6 |
|  | 2.29e+018 | 0.2-0.7 | 5010 | 5 |
|  | 2.98e+018 | 1.5-6 | 5400 | 6 |
|  | 3.15e+018 | 0.3-0.9 | 5500 | 12 |
|  | 5.96e+018 | 1-6 | 6778 | 6 |
|  | 5.96e+018 | 1-6 | 6800 | 6 |
|  | 6.52e+018 | 0.3-0.7 | 6660 | 5 |
|  | 1.27e+019 | 0.3-0.9 | 8100 | 7 |
|  | 1.49e+019 | 1-6 | 10000 | 6 |
|  | 2.12e+019 | 0.3-0.7 | 9500 | 5 |
|  | 1.13e+020 | 4-10 | 15000 | 4 |
|  | 2.26e+020 | 5-20 | 15000 | 3 |
|  | 3.39e+020 | 10-30 | 13400 | 2 |
|  | 3.93e+020 | 1-38 | 17000 | 3 |
|  | 5.66e+020 | 17 | 19000 | 1 |
|  | 6.79e+020 | 2-30 | 17000 | 6 |
|  | 1.24e+021 | 3-50 | 18500 | 3 |
| 343 | 8.42e+017 | 1.3-4.3 | 6890 | 5 |
|  | 1.07e+018 | 1-5 | 8270 | 5 |
|  | 1.17e+018 | 1-6 | 8000 | 7 |
|  | 1.68e+018 | 1.3-4 | 9500 | 5 |
|  | 2.01e+018 | 1-5 | 13000 | 6 |

| **T / K** | **[He] / cm-3** | **[t-C4H9ONO]0 / 1014 cm-3** | **k1 / s-1** | **No.** |
| --- | --- | --- | --- | --- |
| 343 | 3.03e+018 | 1.1-3 | 13400 | 5 |
|  | 3.03e+018 | 1-5 | 11500 | 5 |
|  | 3.20e+018 | 3 | 16500 | 3 |
|  | 5.61e+018 | 1.3-6 | 18000 | 8 |
|  | 5.70e+018 | 3-6 | 20000 | 5 |
|  | 1.13e+019 | 4-6 | 27000 | 5 |
|  | 1.17e+019 | 1-3 | 24600 | 5 |
|  | 2.20e+019 | 6 | 32000 | 4 |
|  | 1.07e+020 | 3-15 | 43300 | 3 |
|  | 3.20e+020 | 9-45 | 49500 | 3 |
|  | 6.19e+020 | 6-20 | 53070 | 2 |
|  | 9.82e+020 | 10 | 55000 | 2 |
| 363 | 7.18e+017 | 0.5-1.3 | 18000 | 4 |
|  | 7.98e+017 | 1.4-6 | 20000 | 6 |
|  | 9.05e+017 | 1-3.6 | 14300 | 8 |
|  | 1.60e+018 | 1-5 | 23700 | 6 |
|  | 1.78e+018 | 1-5 | 27500 | 10 |
|  | 2.71e+018 | 1-6 | 31600 | 6 |
|  | 3.11e+018 | 0.4-1.3 | 37000 | 5 |
|  | 3.38e+018 | 1.2-6 | 38000 | 8 |
|  | 5.32e+018 | 1.3-6 | 47500 | 6 |
|  | 5.40e+018 | 0.6-1.2 | 46000 | 4 |
|  | 6.71e+018 | 1.2-6 | 52000 | 8 |
|  | 1.12e+019 | 0.4-1.0 | 65000 | 4 |
|  | 1.35e+019 | 1.4-6.4 | 74000 | 8 |
|  | 1.44e+019 | 1.6-6 | 69700 | 6 |
|  | 1.85e+019 | 0.5-2.0 | 70000 | 4 |
|  | 2.15e+019 | 1.8-8 | 85000 | 8 |
|  | 1.01e+020 | 7-24 | 135000 | 2 |
|  | 3.03e+020 | 14-23 | 157000 | 2 |
|  | 5.46e+020 | 18-41 | 175000 | 3 |
|  | 9.10e+020 | 8.5-30 | 155000 | 2 |
|  | 1.07e+021 | 10-36 | 150000 | 2 |

| **T / K** | **[He] / cm-3** | **[t-C4H9ONO]0 / 1014 cm-3** | **k1 / s-1** | **No.** |
| --- | --- | --- | --- | --- |
| 383 | 7.57e+017 | 1 | 42000 | 4 |
|  | 8.07e+017 | 0.3-0.4 | 30000 | 2 |
|  | 8.07e+017 | 0.2-4.4 | 48000 | 7 |
|  | 1.06e+018 | 1-6 | 40000 | 7 |
|  | 1.69e+018 | 1.4-5 | 58000 | 10 |
|  | 1.69e+018 | 2-3.2 | 45000 | 2 |
|  | 1.84e+018 | 1.2 | 65000 | 4 |
|  | 2.02e+018 | 0.8-1.5 | 63000 | 7 |
|  | 2.65e+018 | 2 | 70000 | 2 |
|  | 2.82e+018 | 0.8-6 | 72000 | 10 |
|  | 4.54e+018 | 0.8-4.5 | 100000 | 7 |
|  | 5.25e+018 | 2 | 100000 | 5 |
|  | 6.15e+018 | 1.6-8 | 128000 | 10 |
|  | 8.93e+018 | 1-2.5 | 126000 | 4 |
|  | 9.58e+018 | 1-4 | 138000 | 7 |
|  | 1.25e+019 | 1.6-8.6 | 170000 | 10 |
|  | 1.30e+019 | 1.8-2.6 | 157000 | 5 |
|  | 1.84e+019 | 1.8-8.6 | 195000 | 9 |
|  | 1.90e+019 | 2 | 170000 | 5 |
|  | 9.58e+019 | 7-24 | 310000 | 2 |
|  | 2.88e+020 | 14-23 | 423100 | 2 |
|  | 5.04e+020 | 18-41 | 390000 | 2 |
|  | 8.82e+020 | 8.5-30 | 380000 | 2 |
|  | 9.58e+020 | 10-36 | 370000 | 2 |
